# Supplementary material for: Restoring the biophysical properties of decellularized patches through recellularization
Source: Royal Society of Chemistry journal article supplement (doi:10.1039/c7bm00208d), 2017-01-01
Supplement: c7bm00208d1.pdf [file c7bm00208d1.pdf]

## Electronic Supplementary Information

# Restoring Biophysical Properties of Decellularized Patches through Recellularization

---

Gigi Chi Ting Au-Yeung<sup>1§</sup>, Udi Sarig<sup>1§</sup>, Hadar Sarig<sup>1</sup>, Hanumakumar Bogireddi<sup>1</sup>, Tomer Bronshtein<sup>2</sup>, Limor Baruch<sup>2</sup>, Avihai Spizzichino<sup>3</sup>, Jacob Bortman<sup>3</sup>, Boey Yin Chiang Freddy<sup>1</sup>, Marcelle Machluf<sup>2</sup> and Subbu S. Venkatraman<sup>1\*</sup>

<sup>1</sup> NTU-Technion Biomedical labs, School of Materials and Science Engineering,  
Nanyang Technological University, Singapore

<sup>2</sup> Faculty of Biotechnology and Food Engineering, Technion Israel Institute of  
Technology, Haifa, Israel

<sup>3</sup> Department of Mechanical Engineering, Ben-Gurion University of the Negev,  
Beersheba, Israel.

§These authors contributed equally to this work.

\*Corresponding author

Prof. Subbu S. Venkatraman, PhD

Chair, School of Materials Science and Engineering

Director, Ocular Therapeutic Engineering Centre

Director, NTU–Northwestern Institute for Nanomedicine

Deputy Director (Graduate Education), Nanyang Institute of Technology in Health and

Medicine. N4.1-02-05, School of Materials Science and Engineering, Nanyang

Technological University, 50 Nanyang Avenue, Singapore 639798.

Tel: (+65) 6790 4259, E-mail: [assubbu@ntu.edu.sg](mailto:assubbu@ntu.edu.sg)

## **Electronic Supplementary Information**

### **Seeding method analysis**

Seeding methods were compared in terms of cell attachment and proliferation efficiency on the pcECM constructs. Sterile pcECM matrices (1cm diameter) were seeded with MSCs ( $1 \times 10^6$  cells/cm<sup>2</sup>) using the following methods: Surface pipettation, needle injection, centrifugation and vacuum. For pipette surface seeding, 10 shots of 100  $\mu$ l cell suspension were evenly pipetted over the endocardium surface of the pcECM. Needle injection seeding was performed by 10 injections of 100  $\mu$ l cell suspension into the approximate mid-layer bulk of the pcECM, using a 25-gauge x1" hypodermic needle [Sterican®, B. Braun, Melsungen, Germany]. Centrifuge seeding was done by placing the ECM at the tip of 15mL centrifuge tube and submersed with 1mL of cell suspension. The tube was subsequently centrifuged at 500rpm for 2min at room temperature, with re-suspension of tube-bound cells after each centrifuge cycle for three times. For vacuum pump seeding, pcECM was placed on a Nalgene® PES filtering paper (Thermo Fisher Scientific, NY, U.S.A.) and subjected to 2min of 2bar vacuum suction with cell suspension pipetted on top over the time span.

### **Cell proliferation on the pcECM**

AlamarBlue® Assay [Invitrogen, Carlsbad, CA] was used according to manufacturer's instructions and against a standard calibration curve of known cell concentrations performed in 6-well plates. Briefly, after pcECM samples were washed with PBS, 10% alamarBlue® in medium was added to each well and incubated for 4 hrs at 37°C 5% CO<sub>2</sub>. Following the incubation 100  $\mu$ L of incubated solution in quadruplicate were transferred to a 96-well plate for fluorescence reading. Afterwards, scaffolds were washed gently and replenished with fresh media for further culture. Initial cell adherence

## **Electronic Supplementary Information**

was evaluated 4h post seeding, and cell proliferation was evaluated 1, 3, 7 and 10 days post seeding using the AlamarBlue™ assay (Supplementary Fig. S1).

### **Dil-stained cell visualization**

MSCs were pre-labeled with Dil (1, 1-diotadecyl-3, 3, 3, 3-tetramethylindocarbocyanine perchlorate, Life-Technologies, CA, USA), and seeded on pcECM by surface pipettation. One day post seeding, samples were washed with PBS three times and fixated in 4% paraformaldehyde (PFA, Sigma-Aldrich, St-Louis, USA) for 4hr at 4°C. Finally samples were washed 3 time in PBS and imaged using TCS SP5 confocal microscope (Leica, Wetzlar, Germany; Supplementary Fig. S2).

### **FTIR intensity raw data**

Supplementary Fig. S3 displays the comparison of raw data intensities between the various peaks as measured for the different sample groups. Tukey's HSD with one way ANOVA revealed that the peak at 3000-3500nm is relatively stable and non-significantly different between the groups and was therefore used for normalization as appearing in the main manuscript Fig. 3D.

### **Biaxial tensile testing**

To study the anisotropy of the samples, biaxial tensile experiments were performed in collaboration with Prof. Jacob Bortman's Heart Modeling team at Ben Gurion University (BGU). The custom-built heart tissue biaxial testing equipment was composed of four uniaxial motors, four load cells of 20N load capacity, an overhead camera and an integrated computer interface. Specimens were mounted in the orientation where their fiber-preferred direction was aligned with the Y-axis and the cross-fiber direction was

## Electronic Supplementary Information

aligned with the X-axis of the biaxial testing equipment. Samples were equibiaxially preconditioned with 7 cycles of stretching-relaxation up to 10% elongation at 0.1 mm/s. Following preconditioning, measurement was performed by equibiaxial stretching to 10% elongation at 0.15 mm/s. Loads were measured and computed into corresponding stress measurements. Deformations were measured by processing the video tracked images from the overhead camera and computed into corresponding strain measurements (Supplementary Fig. S5).

**Supplementary Table S1:** List of gene primers' accession (GenBank) and catalogue (Qiagen) numbers.

| Gene - Symbol | GenBank accession number | Qiagen Catalog No.     |
|---------------|--------------------------|------------------------|
| ITGAV         | NM_002210                | #330001; PPH00628C-200 |
| COL1A1        | NM_000088                | #330001; PPH01299F-200 |
| NCAM1         | NM_000615                | #330001; PPH00639F-200 |
| SPARC         | NM_003118                | #330001; PPH01175A-200 |
| MMP2          | NM_004530                | #330001; PPH00151B-200 |
| MMP10         | NM_002425                | #330001; PPH00896B-200 |
| MMP11         | NM_005940                | #330001; PPH00236C-200 |
| MMP14         | NM_004995                | #330001; PPH00198C-200 |
| ACTB          | NM_001101                | #330001; PPH00073G-200 |
| GAPDH         | NM_002046                | #330001; PPH00150F-200 |
| HPRT1         | NM_000194                | #330001; PPH01018C-200 |
| RPLP0         | NM_001002                | #330001; PPH21138F-200 |

# Electronic Supplementary Information

## Supplementary Figures

**Supplementary Fig. S1: Screening for optimal seeding method.** Four seeding methods were evaluated (cell injection, vacuum distal to seeding site, cell suspension pipetting and centrifugation, as indicated) for their ability to deliver sustained cell quantities (**A**, 24 hours after seeding) and for their overall effect on the cell proliferation through time on the seeded pcECM constructs (**B**). Statistical significance ( $p<0.05$ ) was calculated using one-way ANOVA with Tukey's HSD test for (**A**) and two-way ANOVA with Tukey's post hoc corrections for the effect of time and seeding groups in (**B**). Groups joined by the same letter in the statistical significance groups of panel (**B**) are insignificantly different.

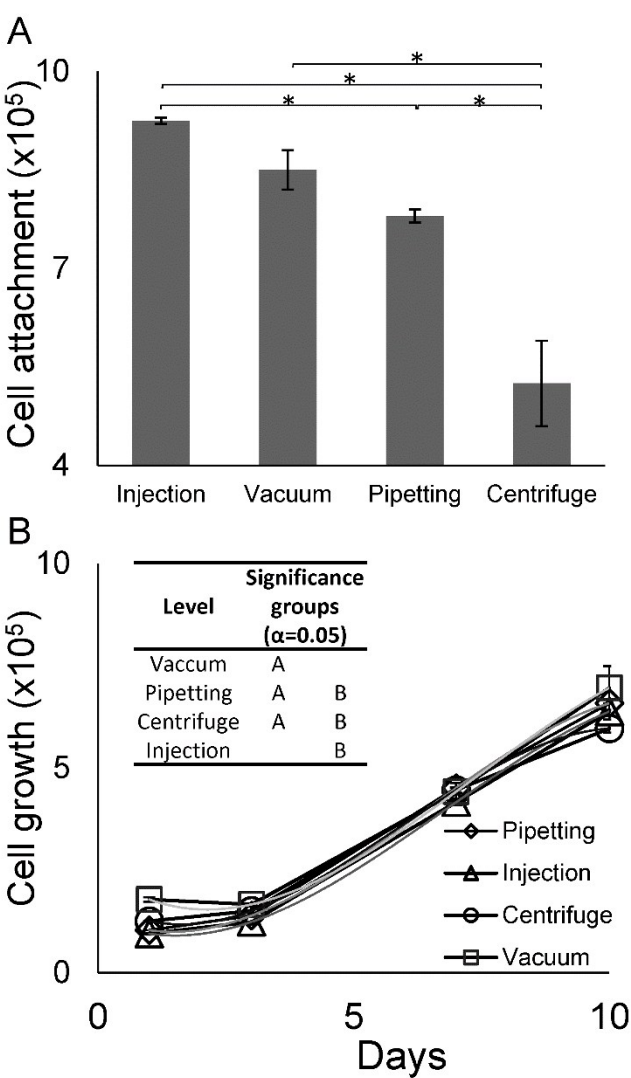

## Electronic Supplementary Information

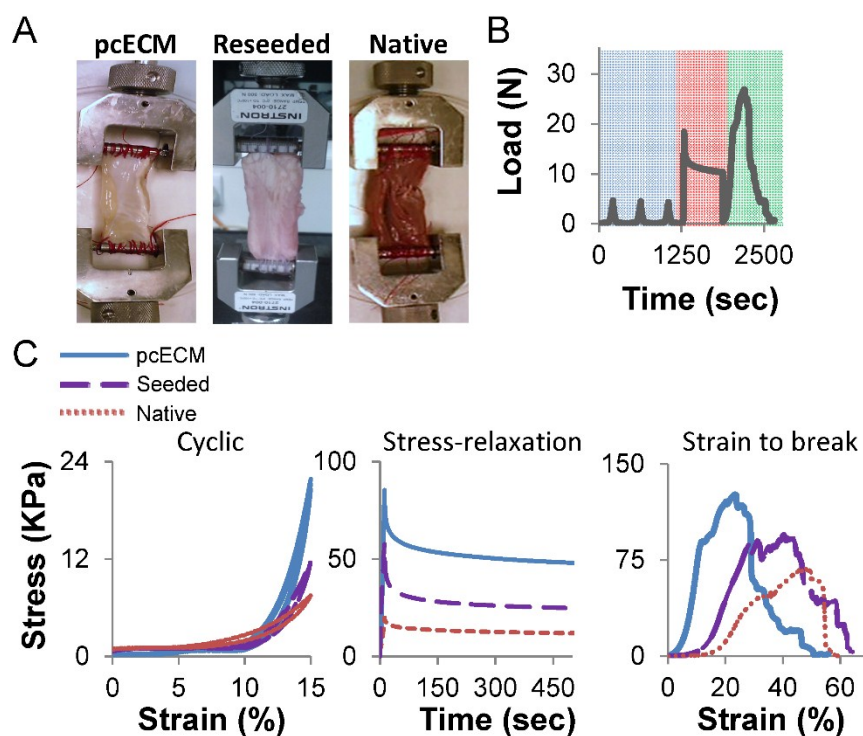

**Supplementary Fig. S2: Representative Uniaxial mechanical testing outputs.** Representative images of pcECM, reseeded and native tissue 30x70x15 mm slabs (**A**, as indicated). Typical testing scheme shows the load (N) as a function of time, in which three distinct testing assays are indicated by different background color—blue, indicating cyclic stress assay; red, indicating stress-relaxation assay; and green, indicating strain-to-break assay (**B**). Corresponding representative output curves from each assay are shown for all three sample types, as indicated in (**C**).

## Electronic Supplementary Information

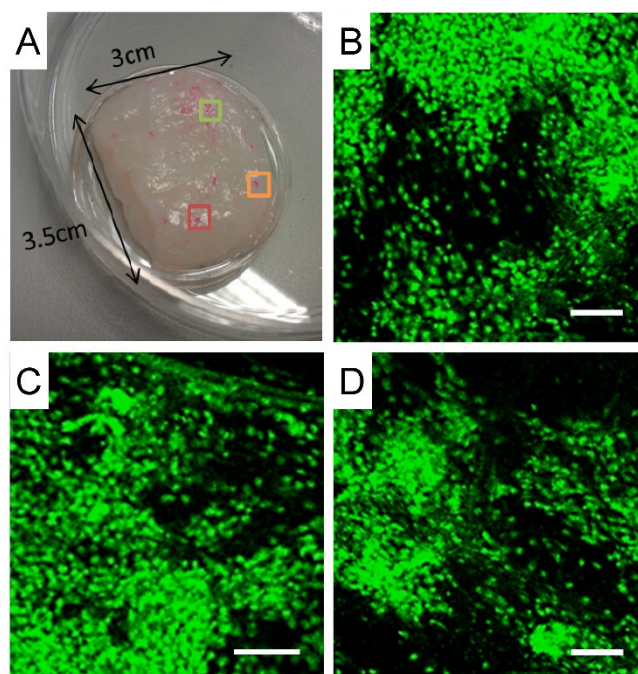

**Supplementary Fig. S3: Confocal imaging of initial cell attachment to the pcECM.**

Pink staining of cell aggregates on pcECM two days after seeding (**A**). Confocal Z-stack superposition (maximum projection) of magnified ROIs from (**A**) visualizing the presence of cells on the seeding surface (**B-D**): Green-squared ROI (**B**); red-squared ROI (**C**); and orange-squared ROI (**D**). Scale bar: 100µm.

## Electronic Supplementary Information

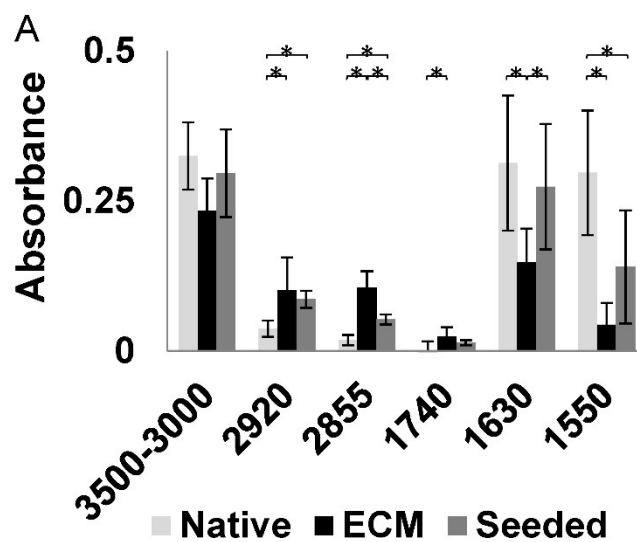

**Supplementary Fig. S4: FTIR (Raw data) peak intensity comparison.** (\*) denotes statistical significance as assessed by one-way ANOVA with Tukey's HSD post hoc correction ( $p < 0.05$ ).



## Electronic Supplementary Information

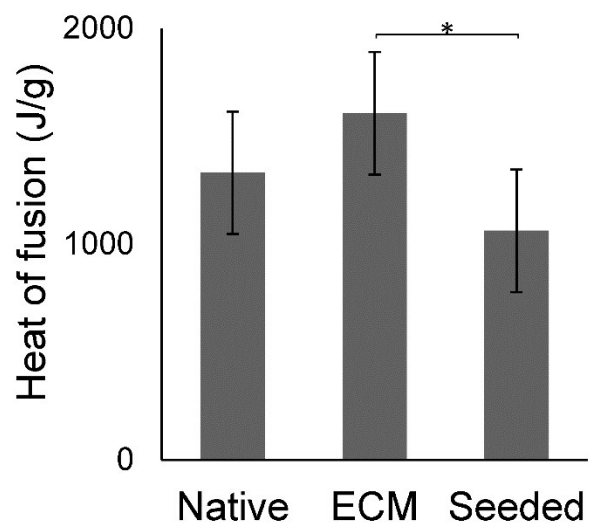

**Supplementary Fig. S5: Heats of fusion for native tissue, decellularized pcECM and seeded pcECM as measured by differential scanning calorimetry (CM). (\*) denotes statistical significance as assessed by one-way ANOVA with Tukey's HSD post hoc correction ( $p < 0.05$ ).**

## Electronic Supplementary Information

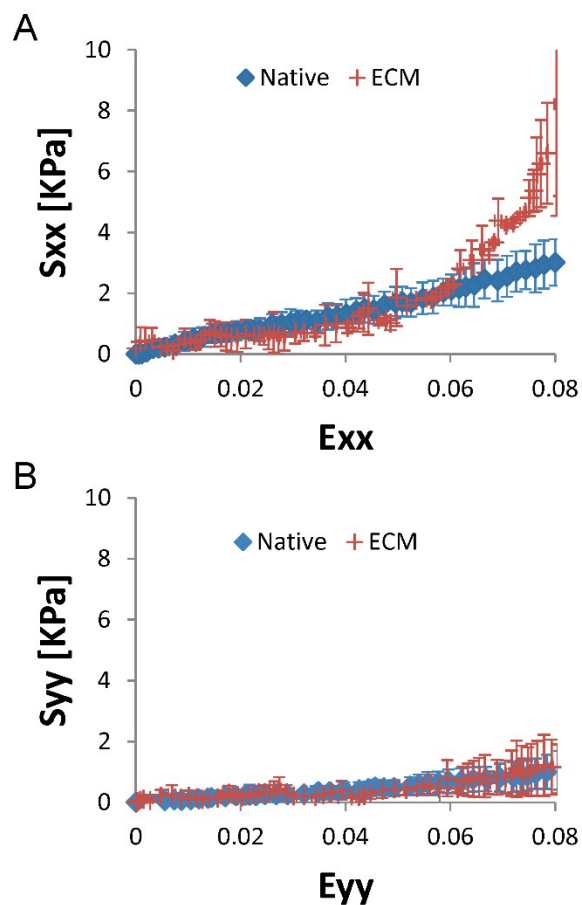

**Supplementary Fig. S6: Biaxial mechanical testing of pcECM and native ventricular tissue.** Stress (S) vs. strain (E) curves of pcECM and native myocardial tissue in the fiber preferred (XX, A) and cross fiber-preferred (YY, B) directions.
